# Supplementary material
Source: PubMed Central journal article supplement (PMC4306619)

# Supplemental Material

## Quantitative Fundus Autofluorescence Distinguishes *ABCA4*-associated and non-*ABCA4*- associated Bull's-Eye Maculopathy

Duncker et al.

AF images of all BEM eyes included in the study are  
presented in the following format:

OD

Patient #  
(Table)

OS

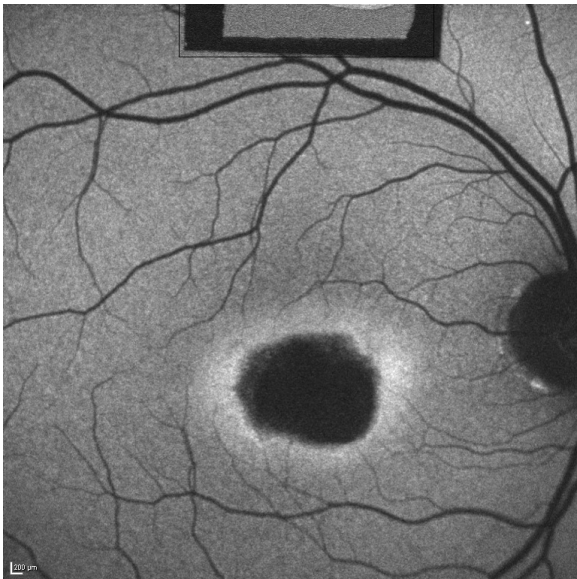

1  
+

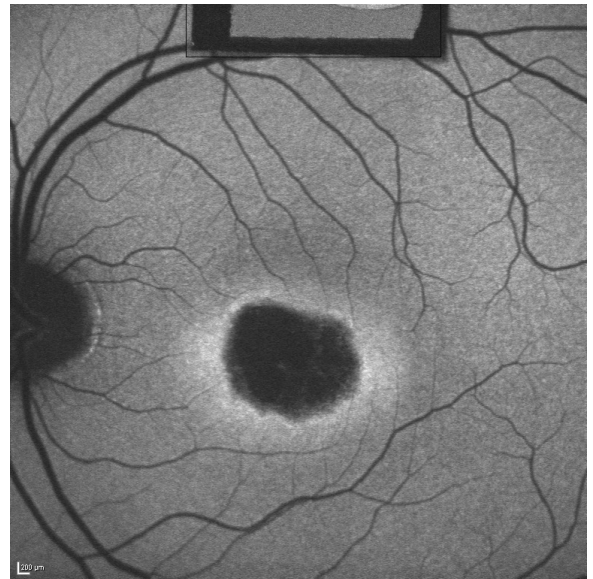

*ABCA4*  
+ / -

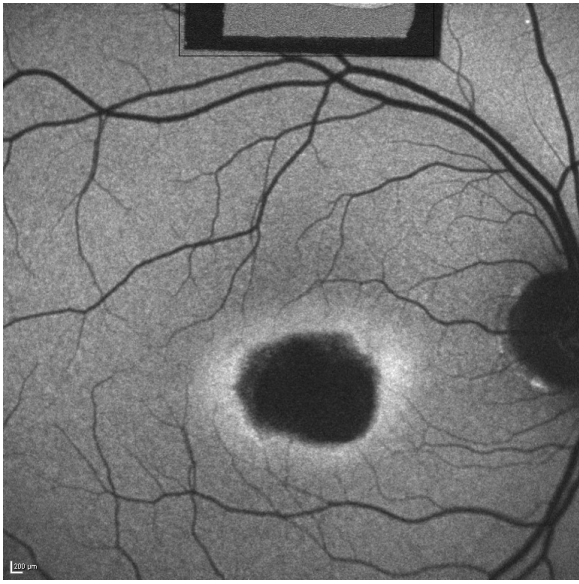

1  
+

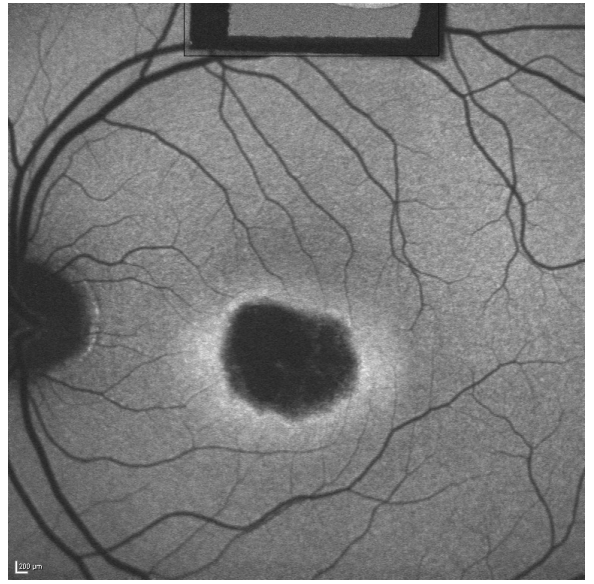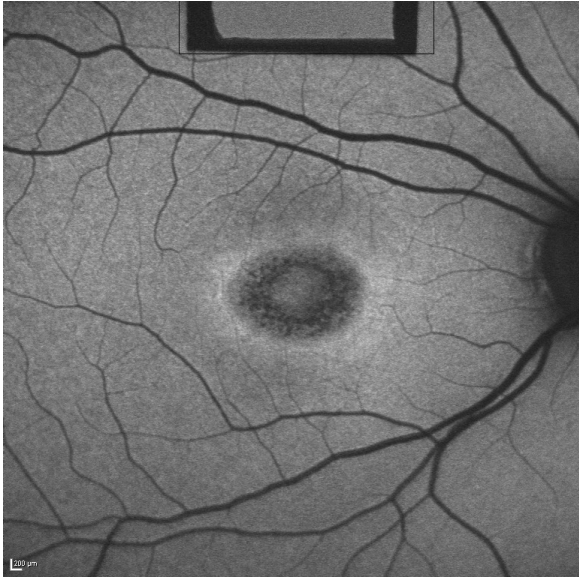

2  
+

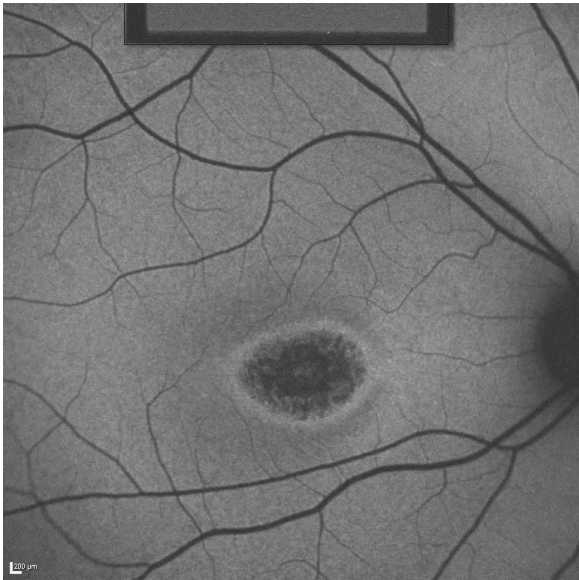

3  
+

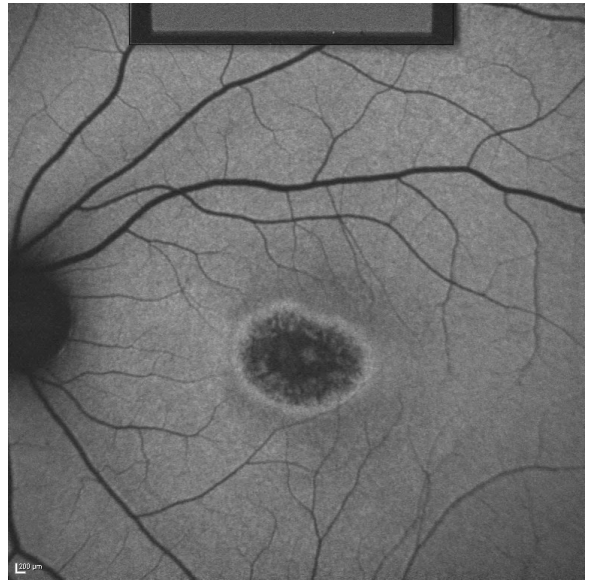

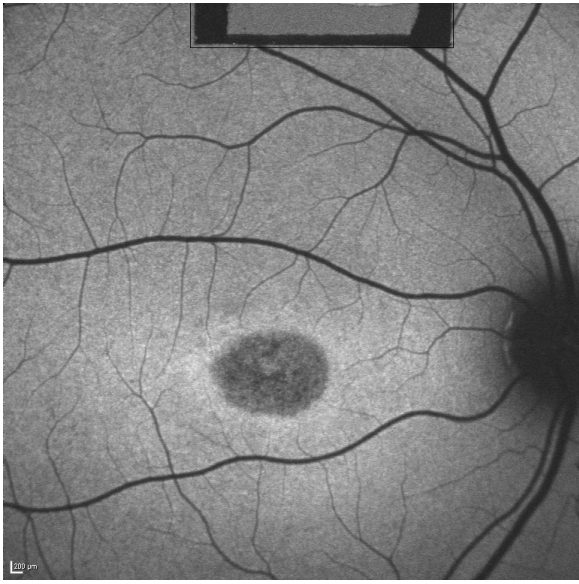

4  
+

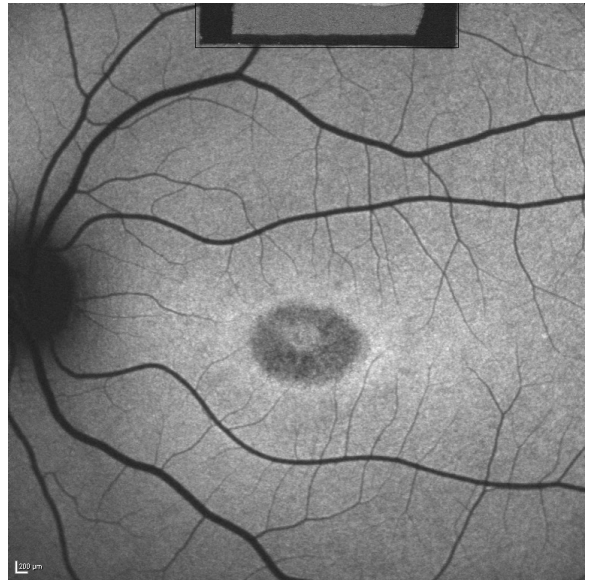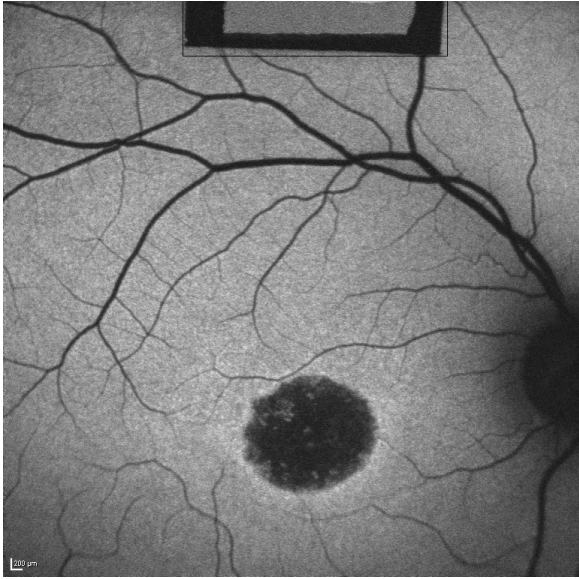

5  
+

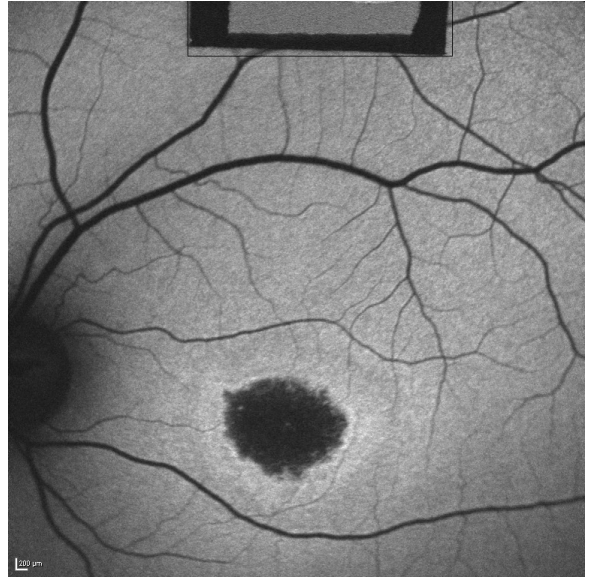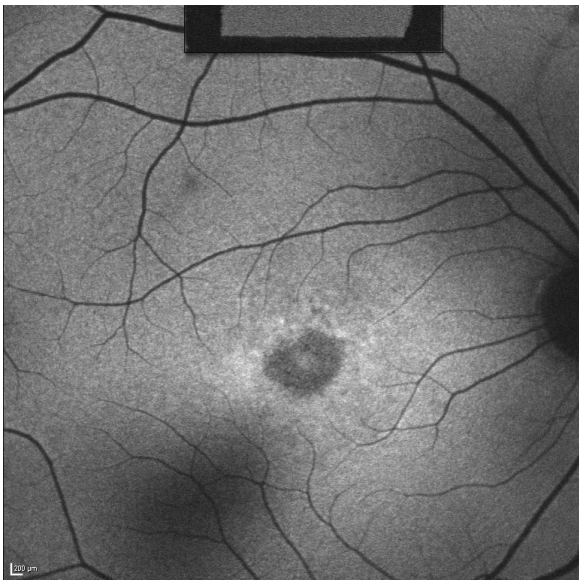

6  
+

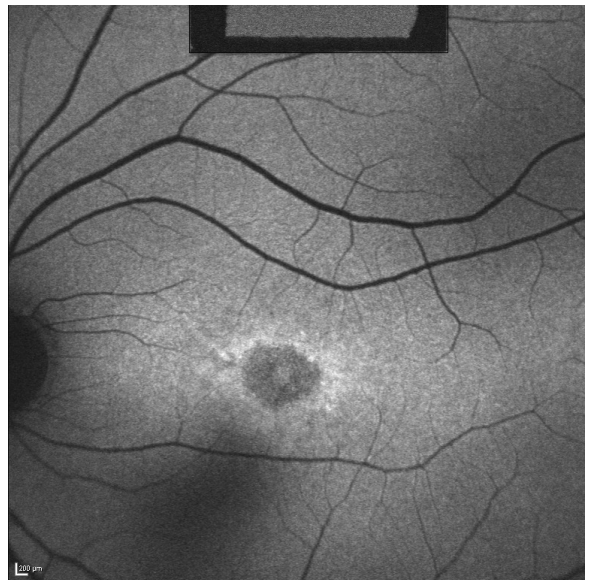

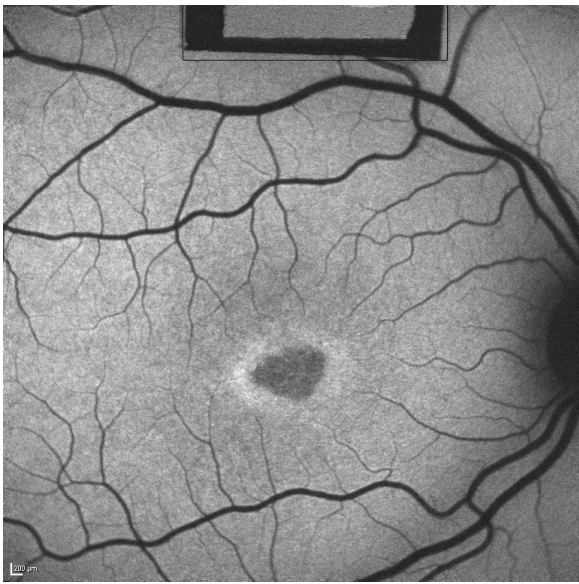

7  
+

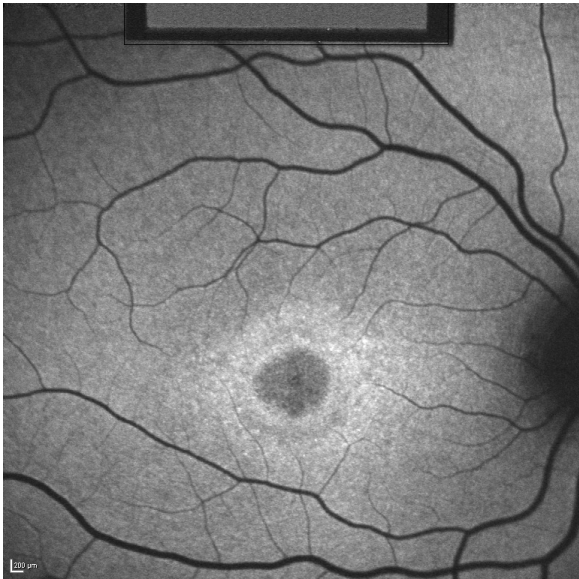

8  
+

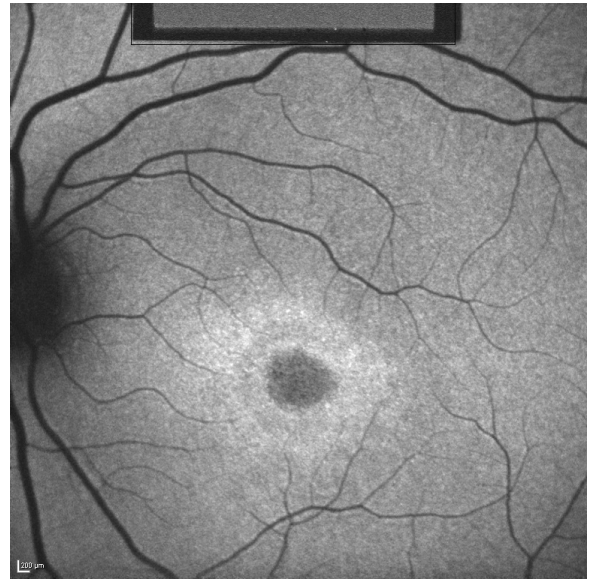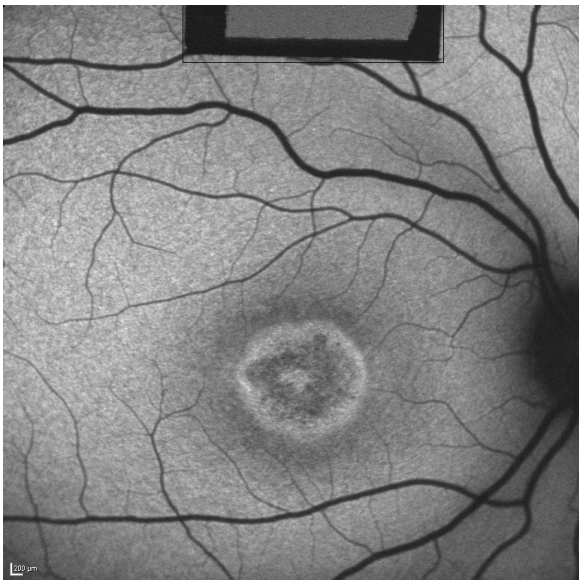

9  
+

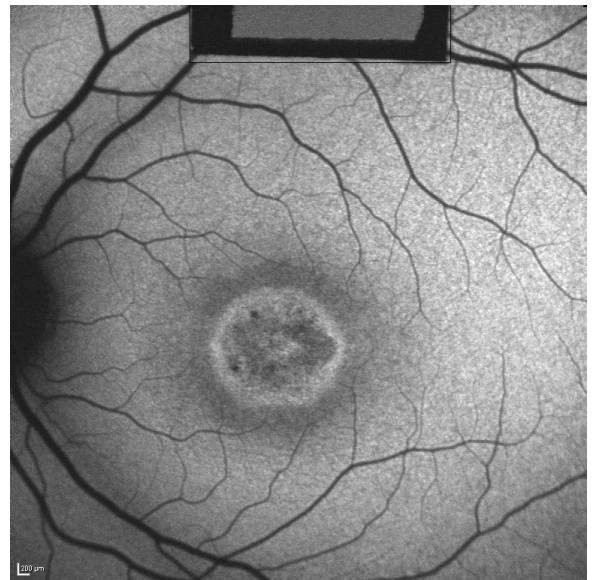

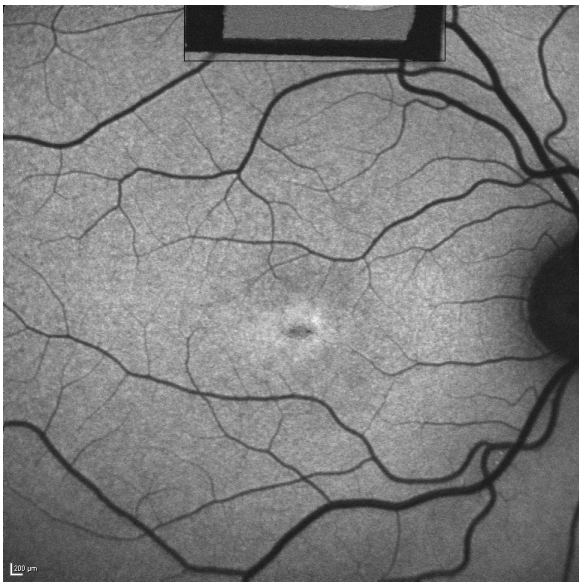

10  
+

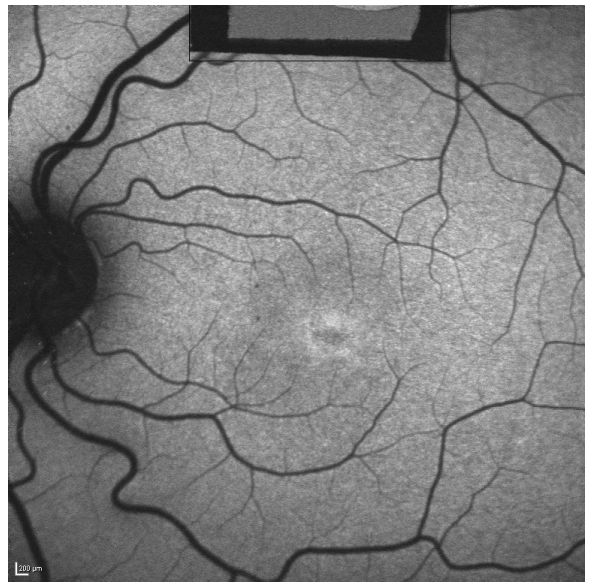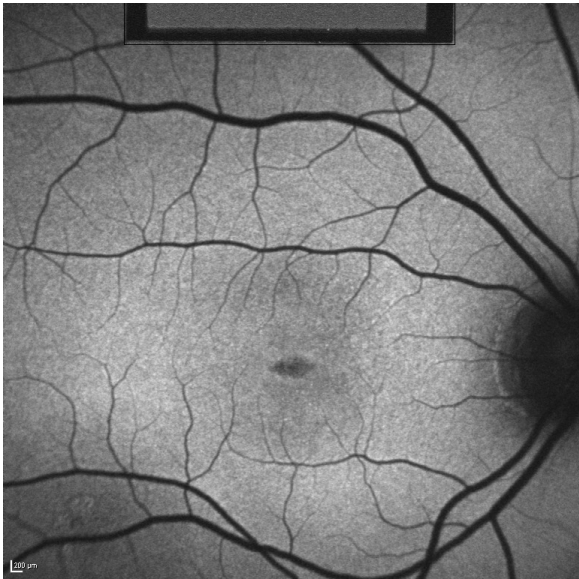

11  
+

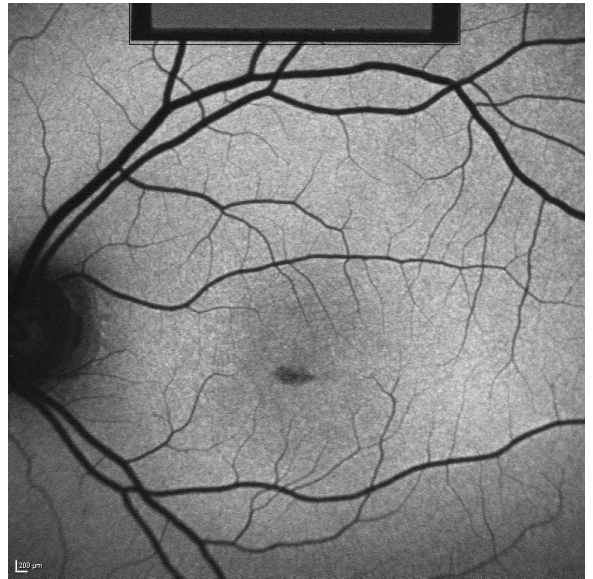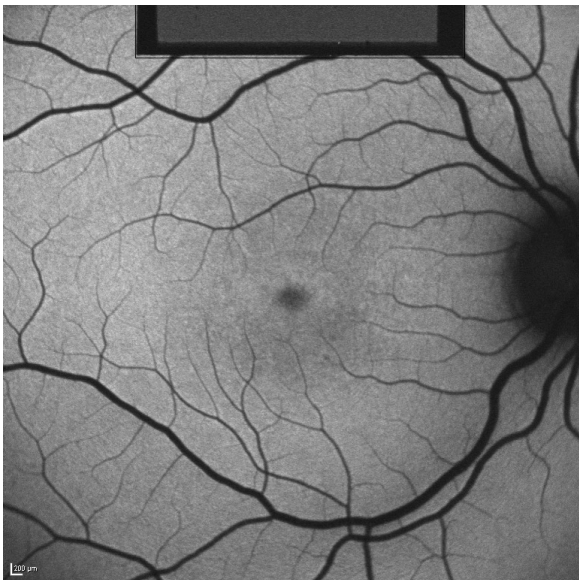

12  
+

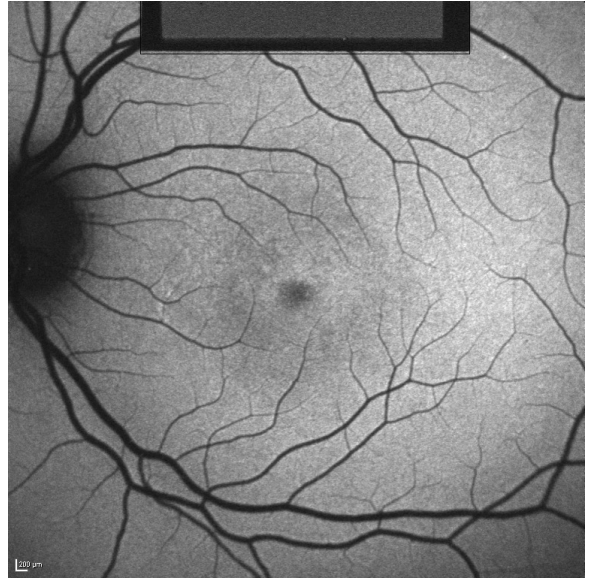

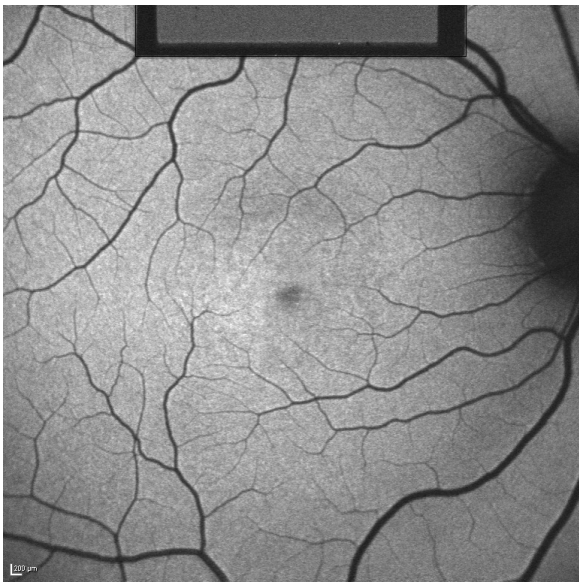

13  
+

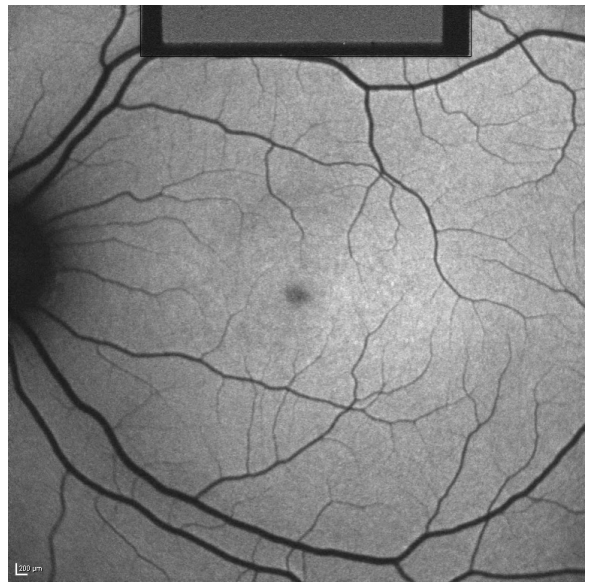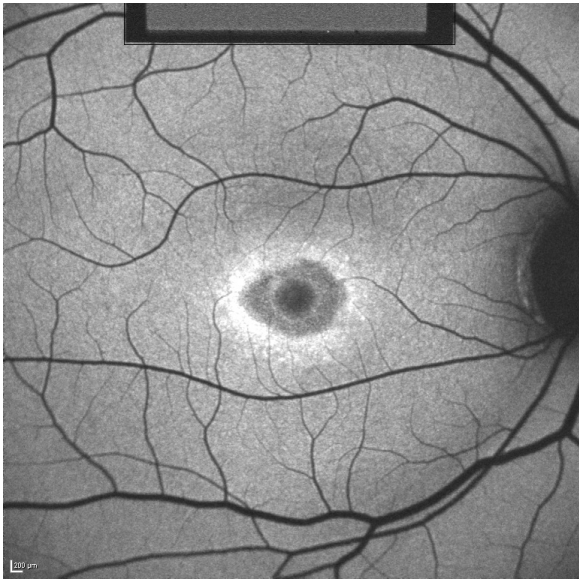

14  
+

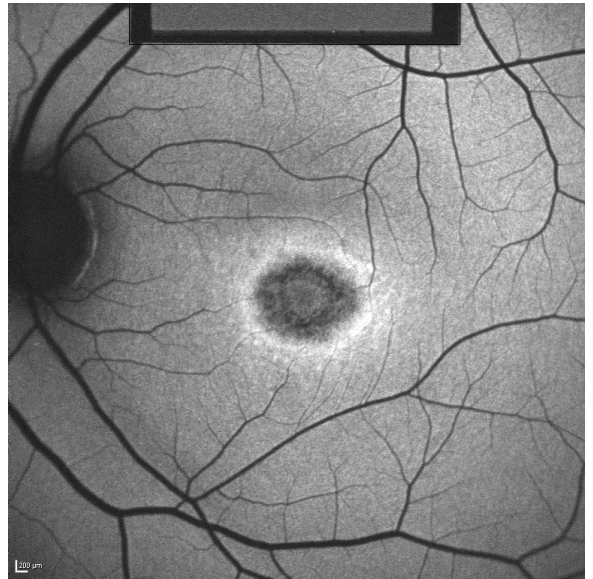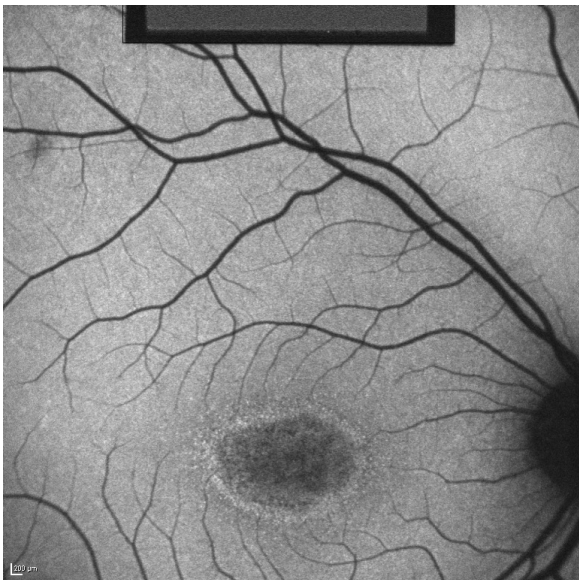

15  
+

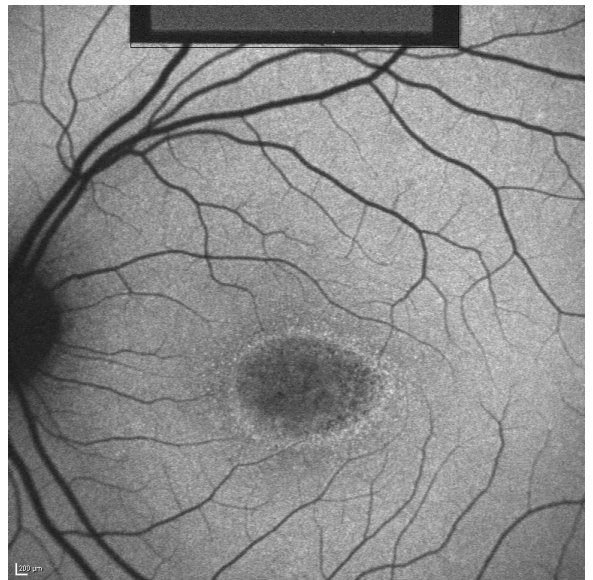

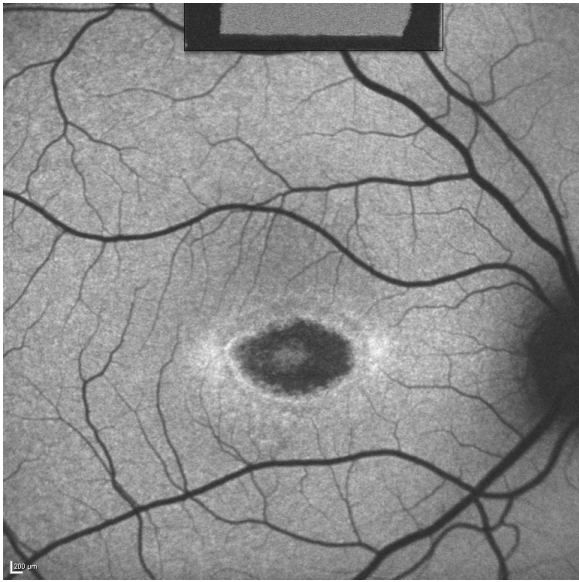

16  
+

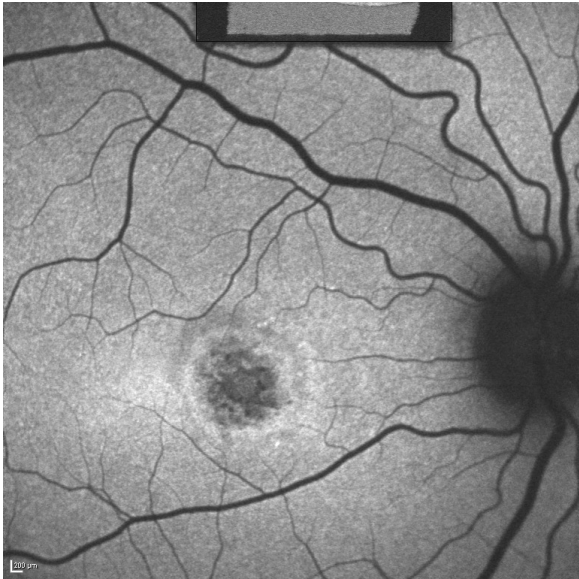

17  
+

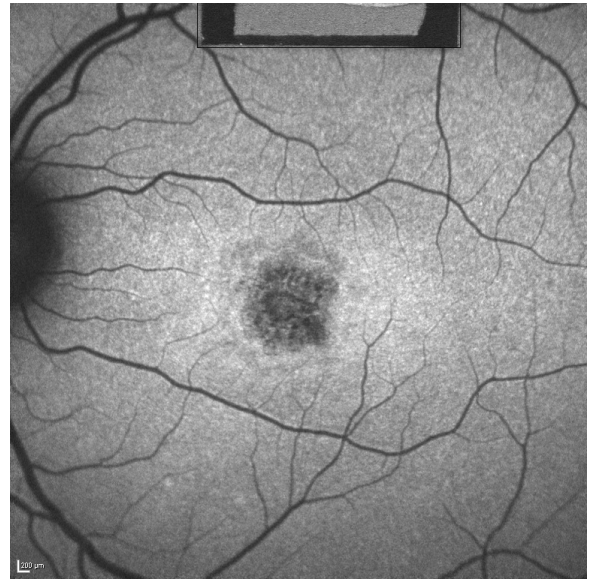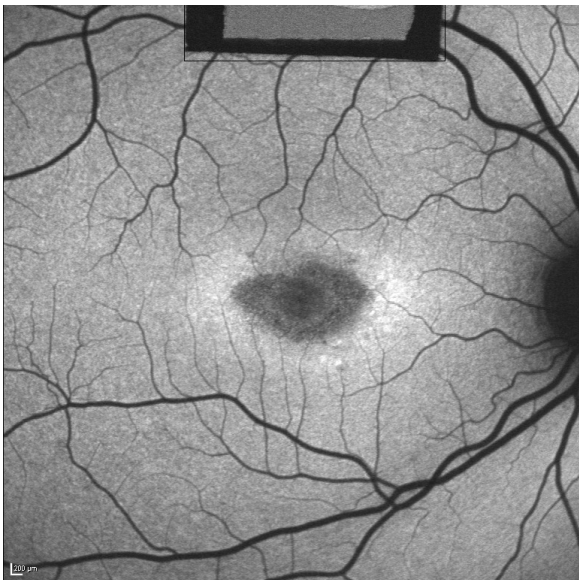

18  
+

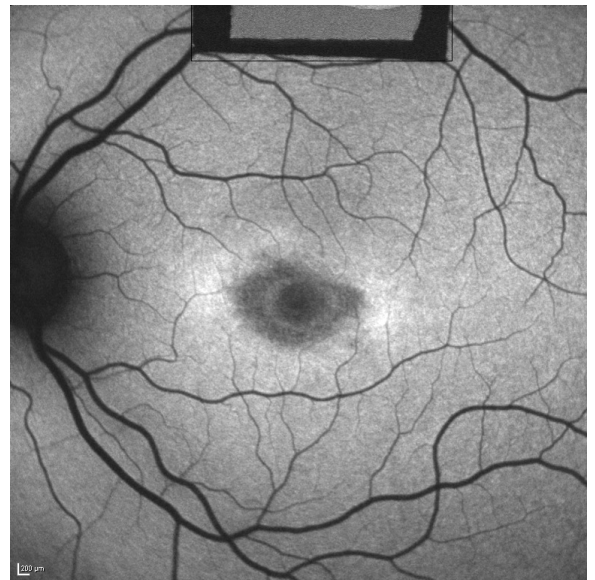

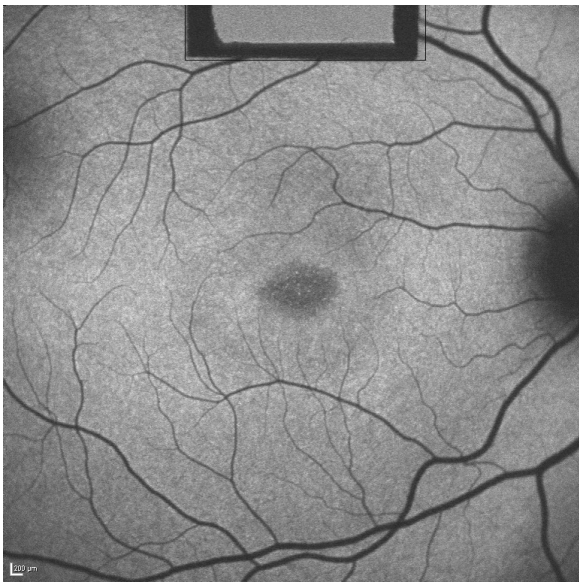

19  
+

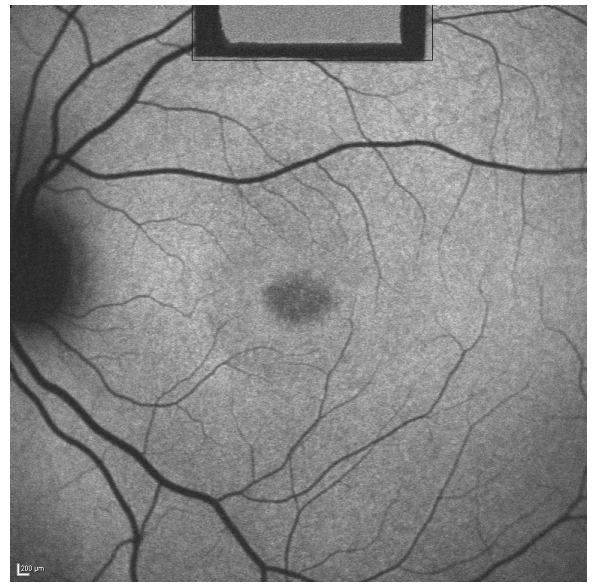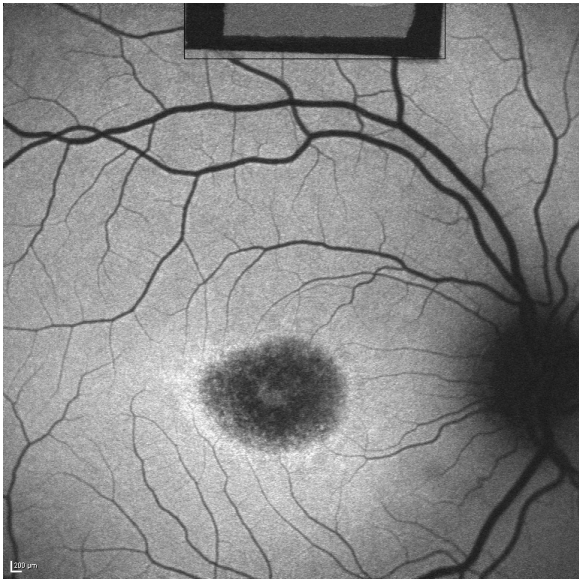

20  
+

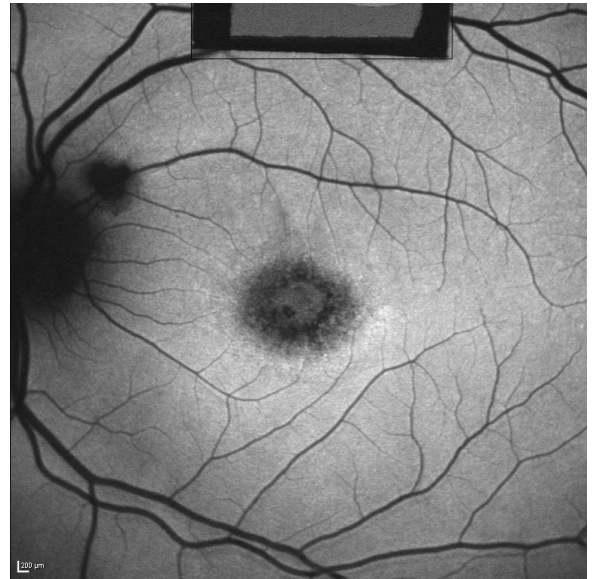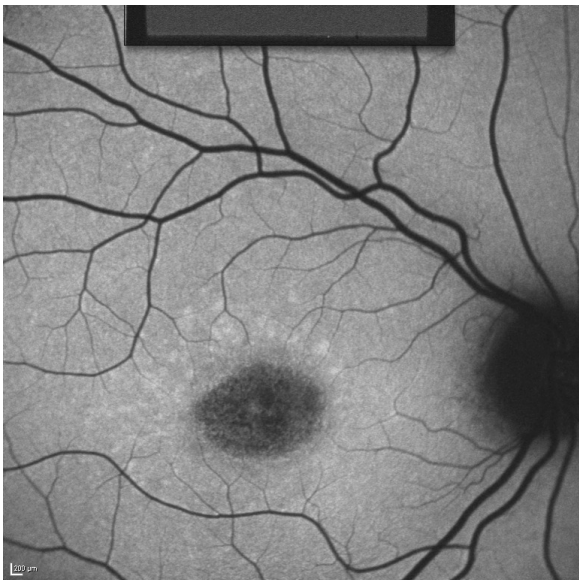

21  
+

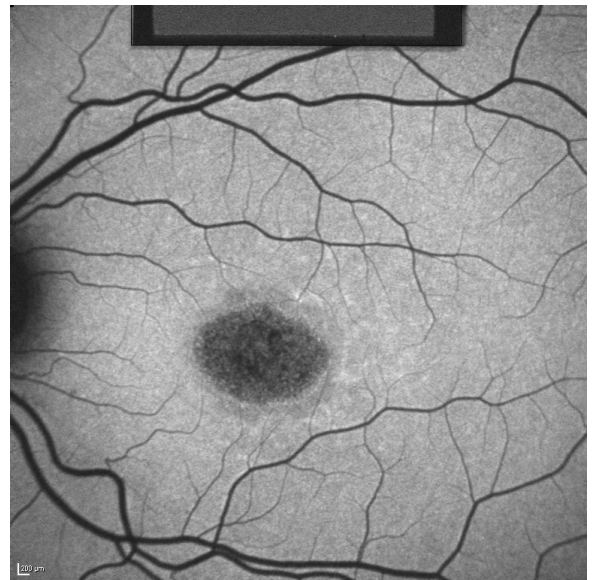



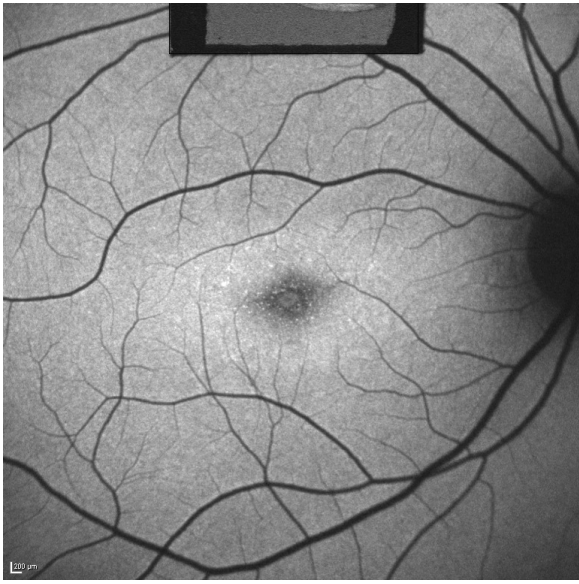

22  
+

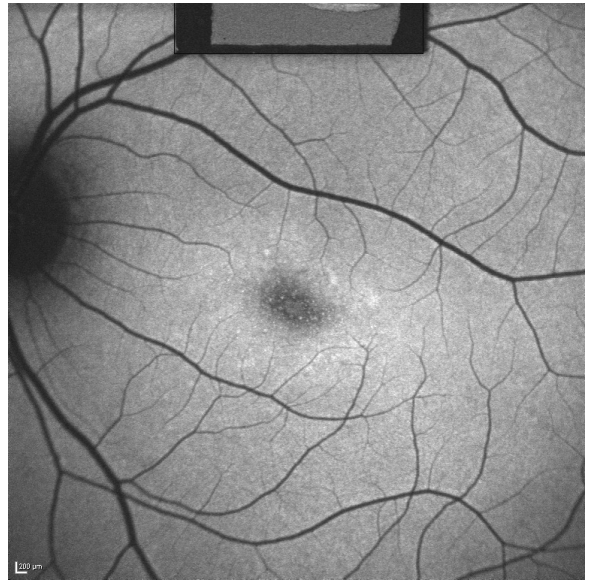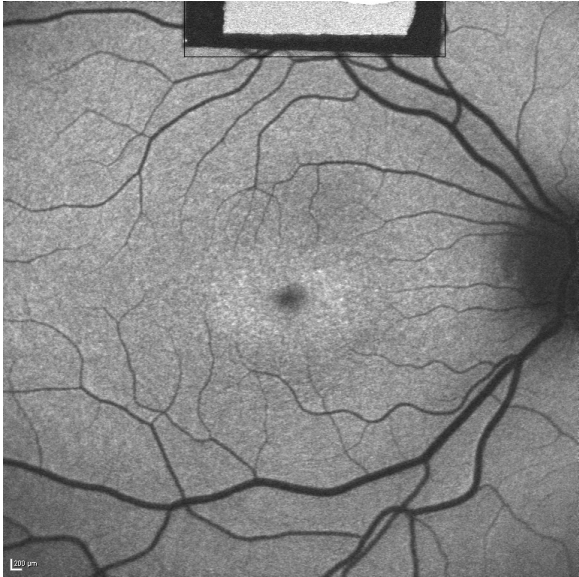

23  
-

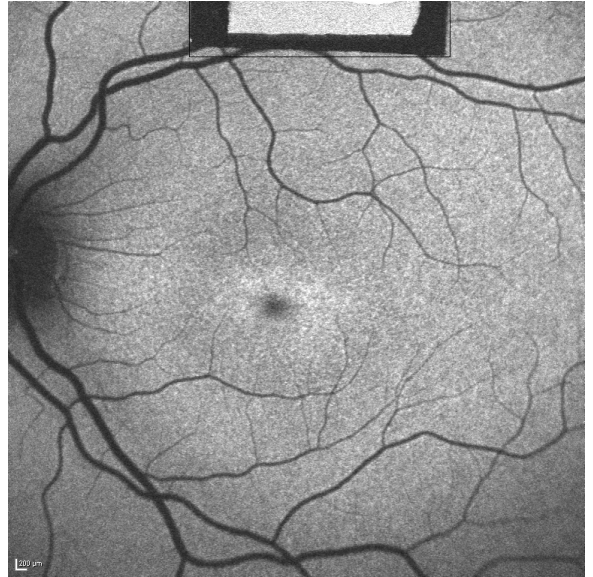

24  
-

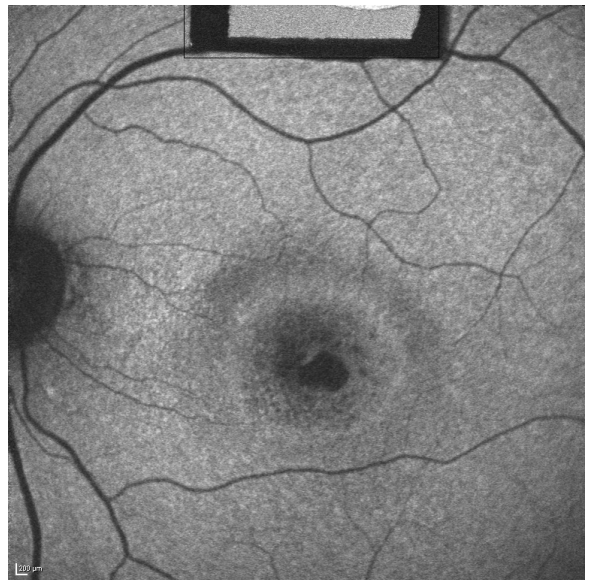

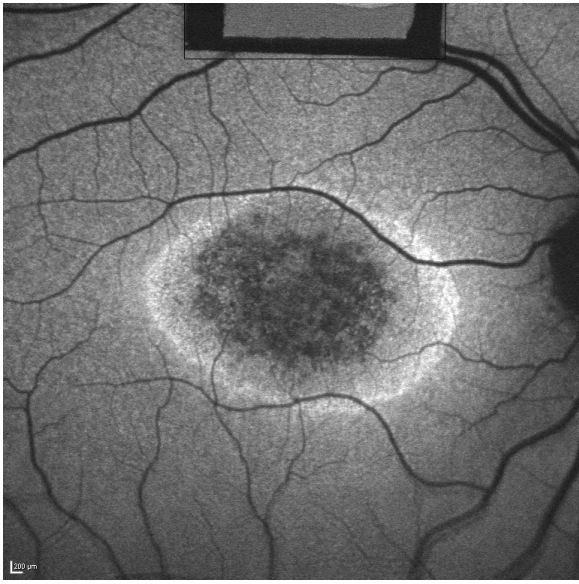

25

-

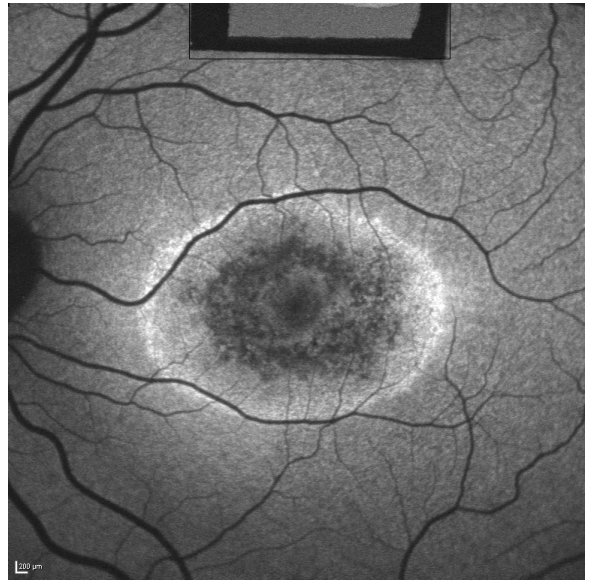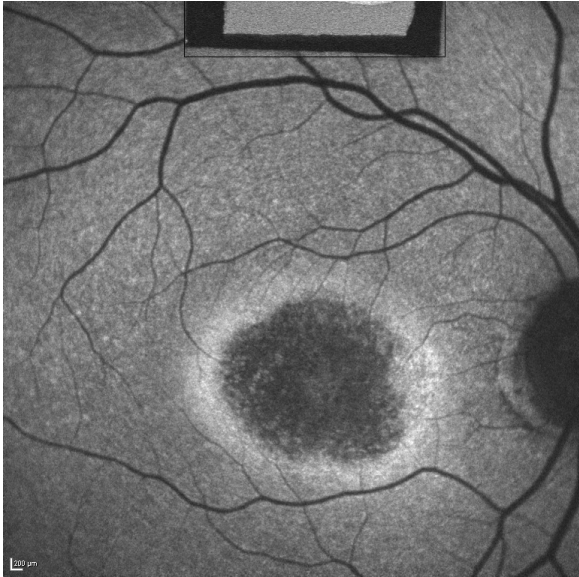

26

-

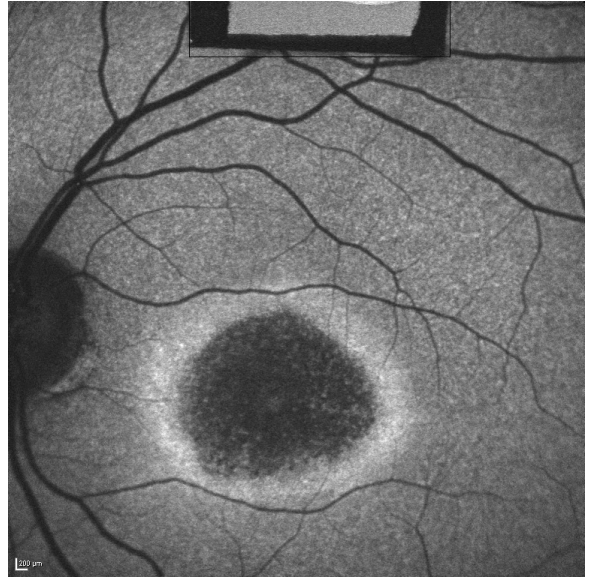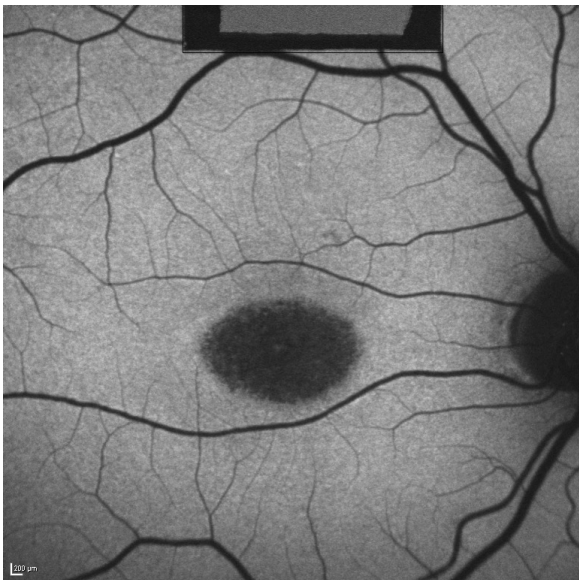

27

-

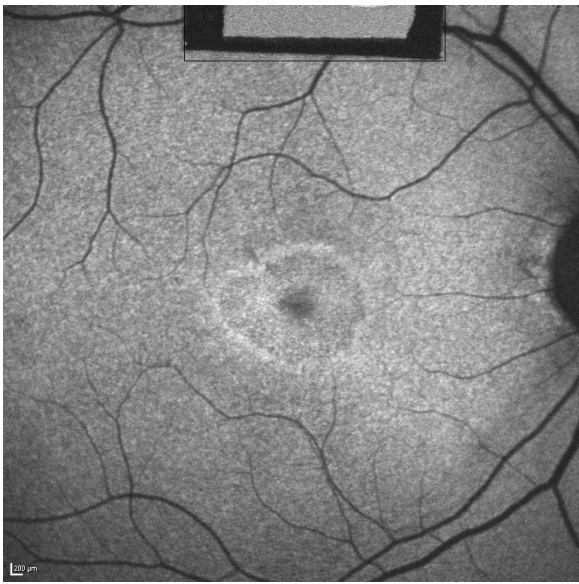

28

-

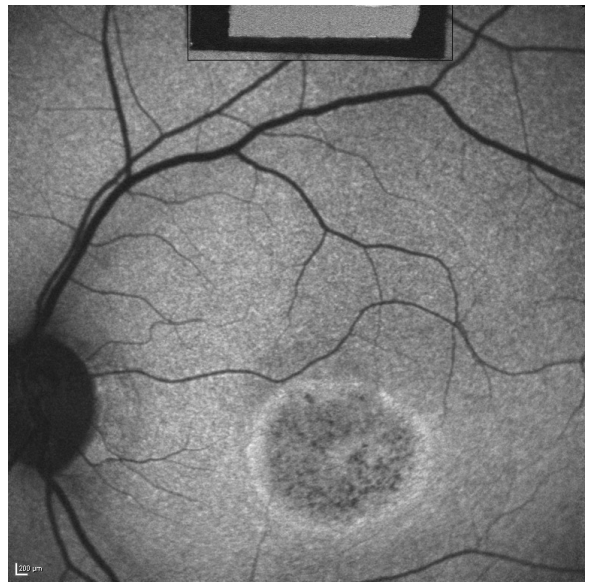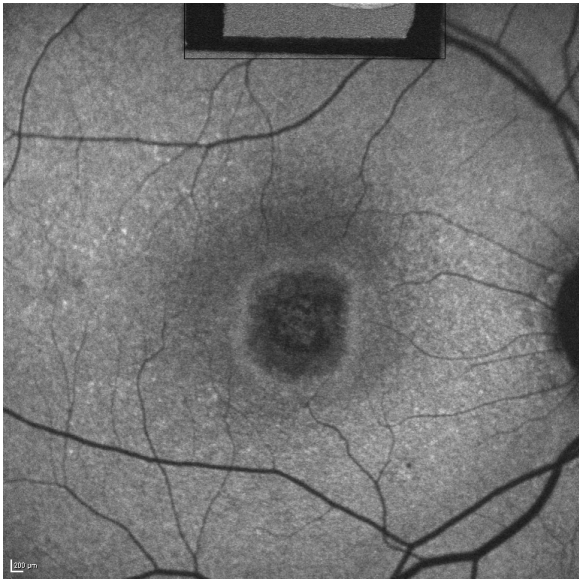

29

-

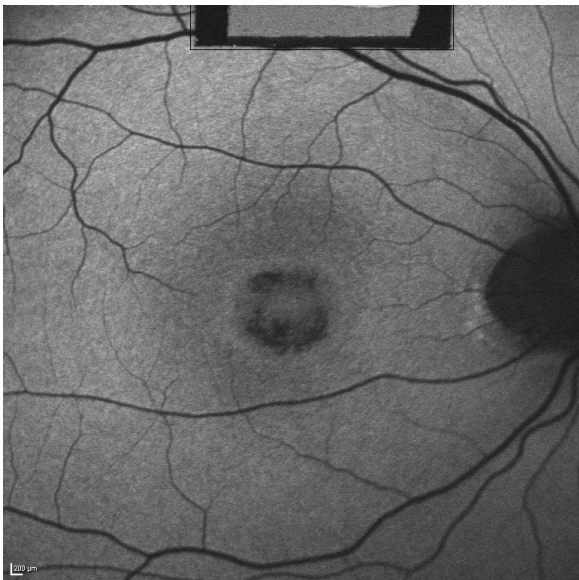

30

-

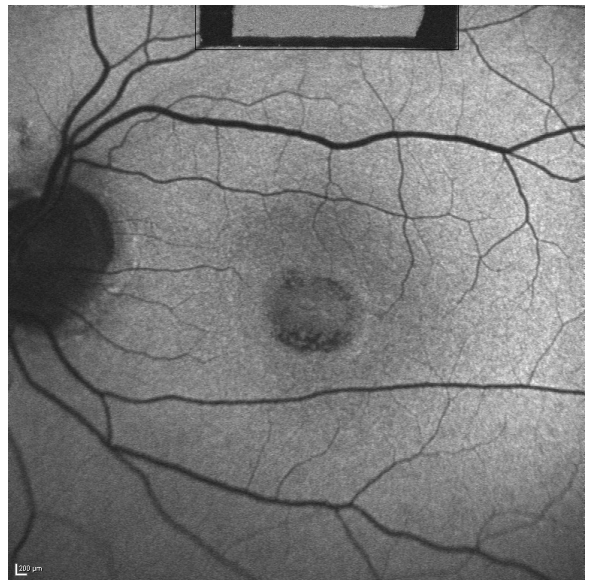

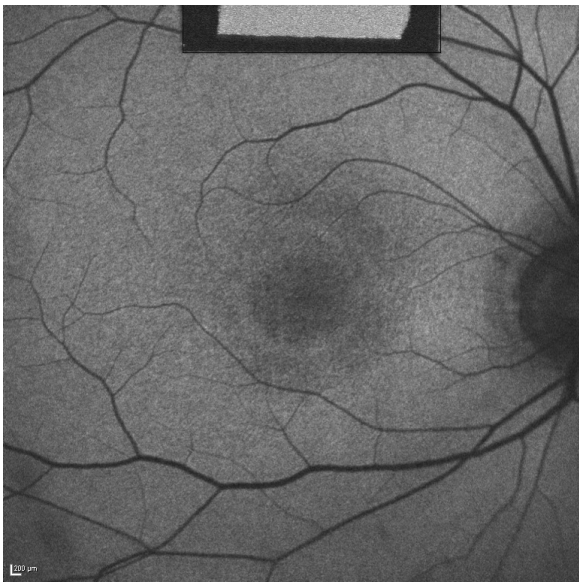

31

-

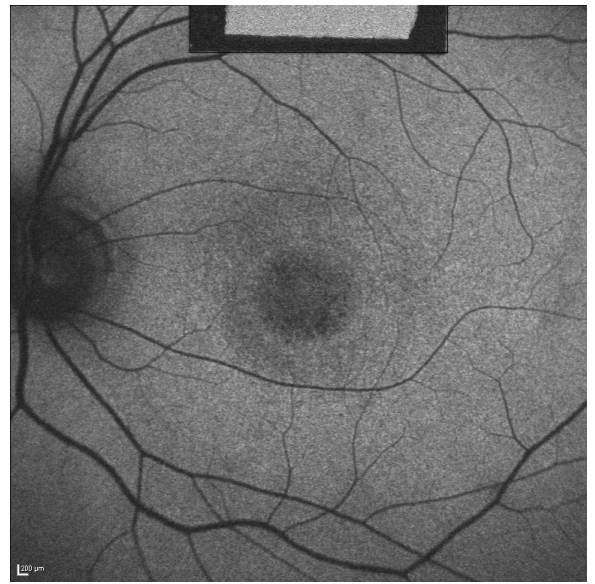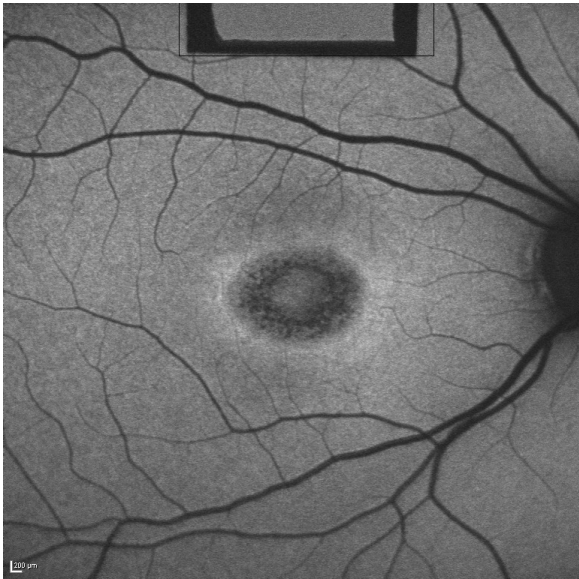

32

-

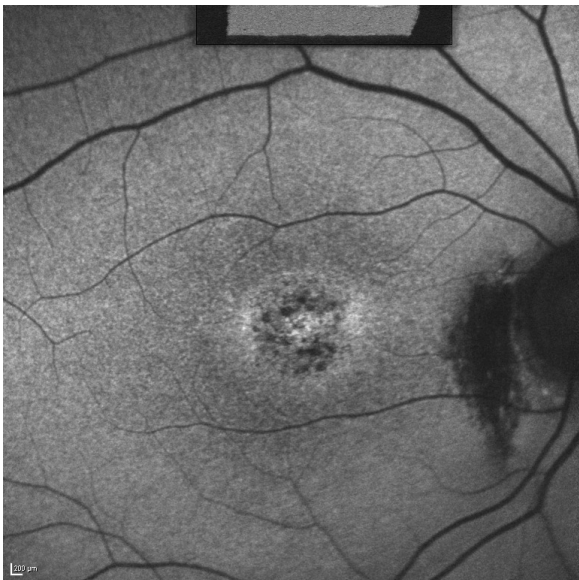

33

-

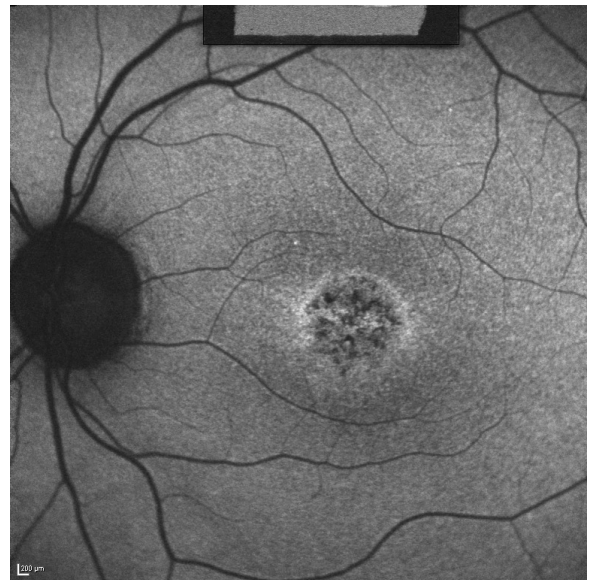

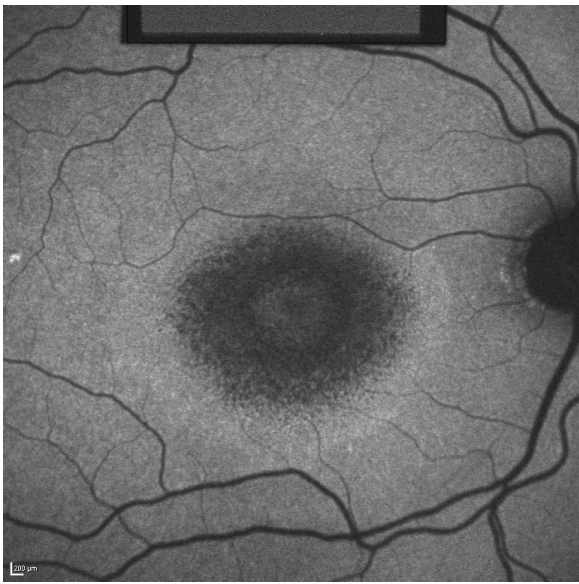

34  
-

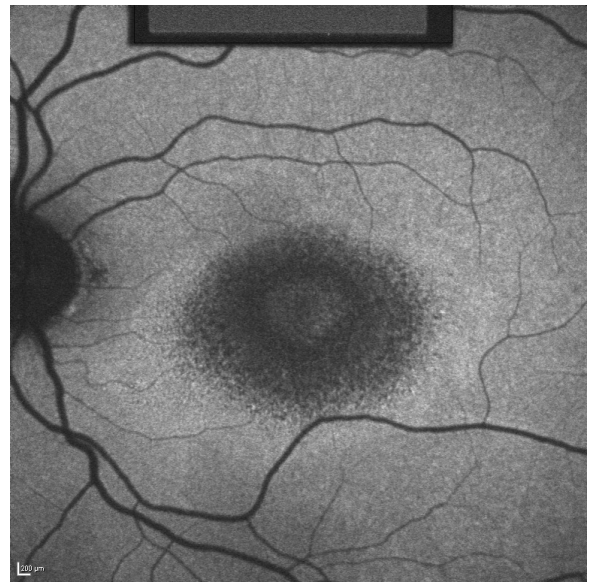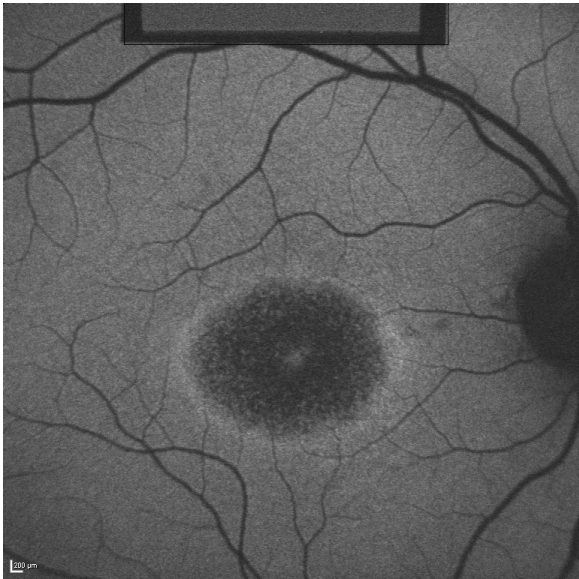

35  
-

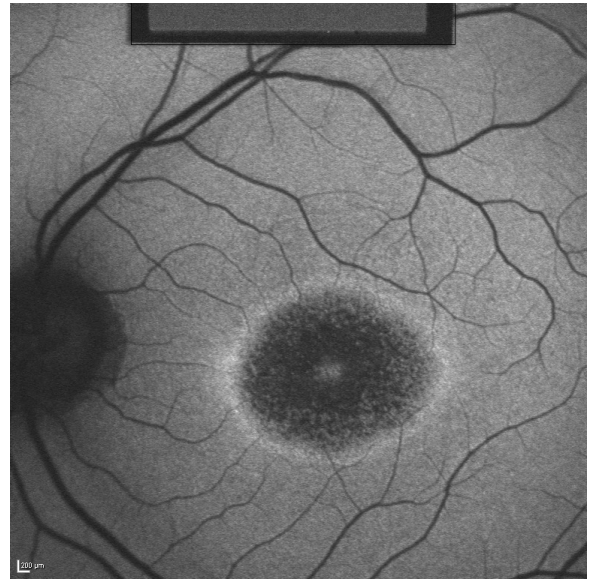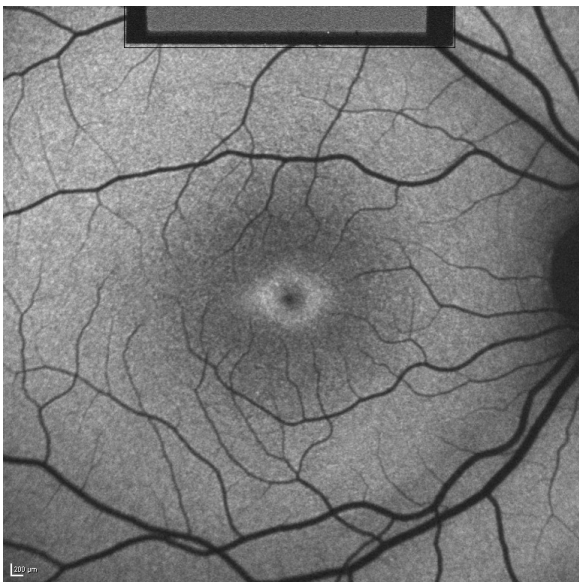

36  
-

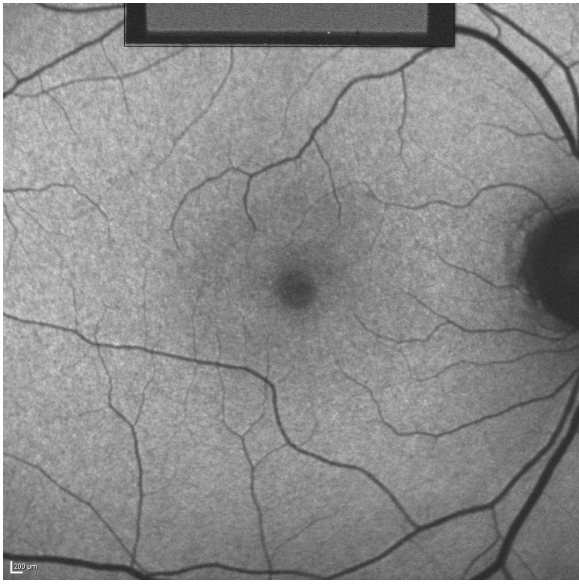

37

-

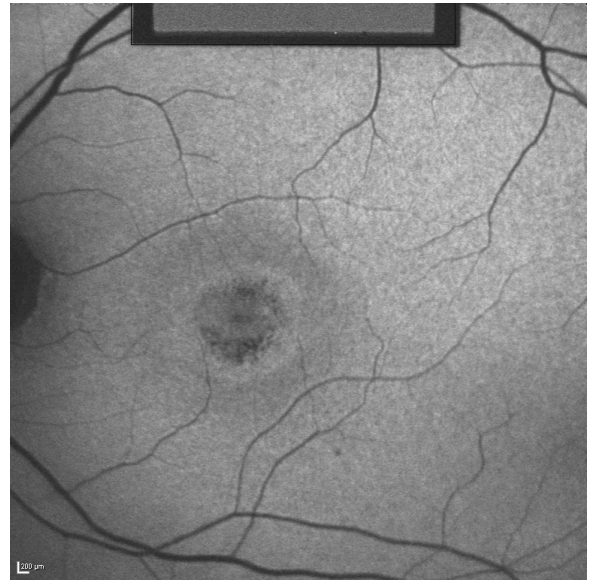

Supplement: NIHMS633369-supplement.pdf [file NIHMS633369-supplement.pdf]
